# Supplementary material for: Protective Effects of Melon Extracts on Bone Strength, Mineralization, and Metabolism in Rats with Ovariectomy-Induced Osteoporosis
Source: PubMed Central journal article supplement (PMC6720457; doi:10.3390/antiox8080306), 2019-08-14
Supplement: antioxidants-08-00306-s001.pdf [file antioxidants-08-00306-s001.pdf]

# Supplementary Materials: Protective Effects of Melon Extracts on Bone Strength, Mineralization, and Metabolism in Rats with Ovariectomy-induced Osteoporosis

Bongju Kim, Sung-Ho Lee, Su-Jin Song, Won Hyeon Kim, Eun-Sung Song, Jae-Chang Lee, Sung-Jae Lee, Dong-Wook Han, Jong-Ho Lee

Table S1. Ingredient of diets used in this study.

| Ingredient (g/kg Diet) |     |
|------------------------|-----|
| Sucrose                | 500 |
| Casein                 | 200 |
| Corn starch            | 150 |
| Cellulose              | 50  |
| Soybean oil            | 50  |
| Mineral mixture        | 35  |
| Vitamin mixture        | 10  |
| L-Cystein              | 3   |
| Choline bitartrate     | 2   |
| Carbohydrate (% kcal)  | 64  |
| Protein (% kcal)       | 20  |
| Fat (% kcal)           | 16  |
| Energy (kcal/g)        | 4   |

## DPPH Assay

The antioxidant activity of melon extracts treated without or with heat (ECO-A) was measured by the DPPH (2,2-diphenyl-1-picrylhydrazyl) assay as described elsewhere [1]. The discoloration of the reaction mixture was measured at 520 nm for 30 min of incubation in the dark. Ascorbic acid solution in DW was used as a reference standard and DW was used as blank (control). The antioxidant activity (%) was defined as the percentage scavenging of the DPPH free radical from the following equation:

$$\text{Percentage scavenging} = \frac{A_0 - A_1}{A_1} \times 100$$

where  $A_0$  = Absorbance of the control and  $A_1$  = Absorbance in the presence of the sample.

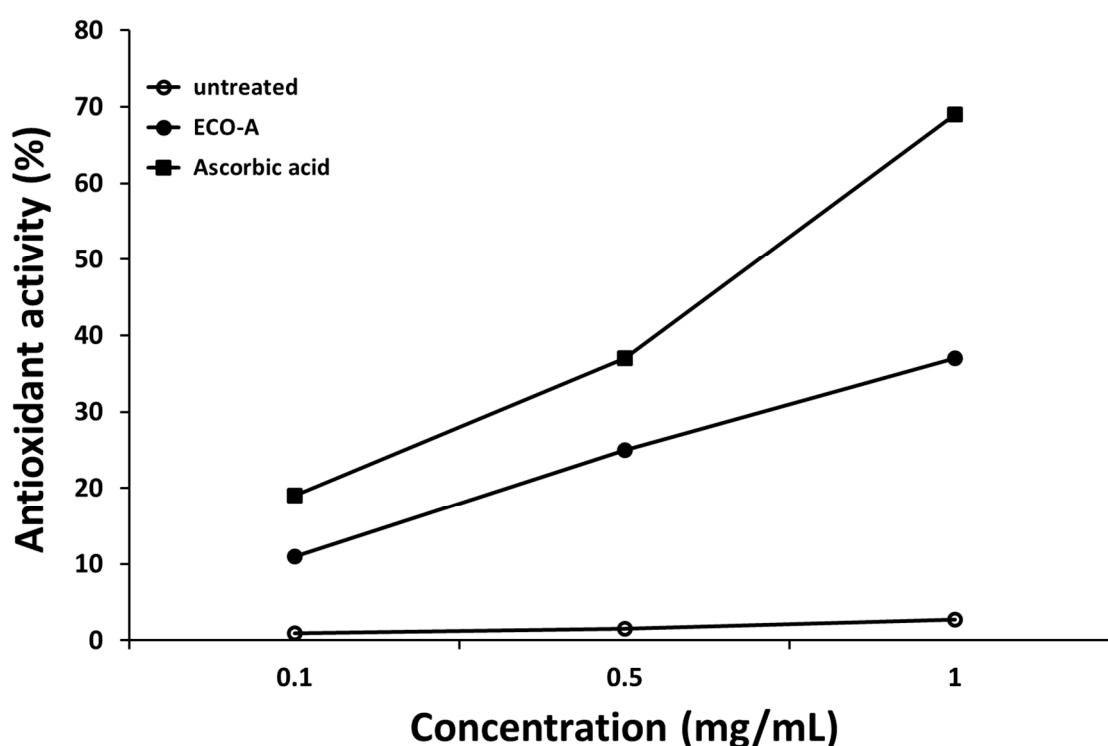

**Figure S1.** Antioxidant activity of melon extracts treated without or with heat (ECO-A) determined by measuring DPPH radical scavenging activity.

## Reference

1. Usha, T.; Middha, S.K.; Bhattacharya, M.; Lokesh, P.; Goyal, A.K. Rosmarinic acid, a new polyphenol from *Baccaurea ramiflora* Lour. leaf: A probable compound for its anti-inflammatory activity. *Antioxidants* **2014**, *3*, 830–842.
